# Supplementary material
Source: Springer Nature journal article supplement (https://www.springermedizin.de/resource/supplementary/12902_2013_257_MOESM2_ESM.pdf/9515888)

PAGE

A 165 THE ASA-EMM

DOB: 0

33.0cm

30.0cm

R  
1  
7  
2

100

10/00.67

P 165

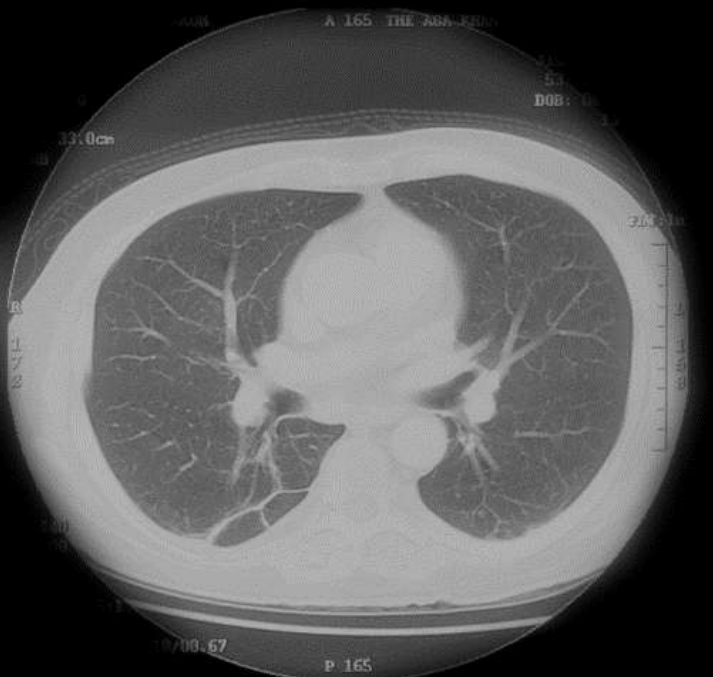

Supplement: MOESM2 [file 9515888]
